# Supplementary material
Source: publisher figshare collection journal article supplement (https://frontiersin.figshare.com/ndownloader/files/22676219)
Supplement: Supplementary file [file 22676219]

## **SUPPLEMENTARY MATERIAL TO**

### **Microbial ecology of methanotrophy in streams along a gradient of CH<sub>4</sub> availability**

Alexandre Bagnoud<sup>1,2</sup>, Paraskevi Pramateftaki<sup>1</sup>, Matthew J. Bogard<sup>3,4</sup>, Tom J. Battin<sup>1</sup> and Hannes Peter<sup>1</sup>

<sup>1</sup>Stream Biofilm and Ecosystem Research Laboratory, School of Architecture, Civil and Environmental Engineering, École Polytechnique Fédérale de Lausanne, Lausanne CH-1015, Switzerland

<sup>2</sup>Current address: Haute École d'Ingénierie et de Gestion du Canton de Vaud, Institut de Génie Thermique, CH-1400 Yverdon-les-Bains, Switzerland

<sup>3</sup>Groupe de recherche interuniversitaire en limnologie, Département des sciences biologiques, Université du Québec à Montréal, Montréal, QC, Canada.

<sup>4</sup>Current address: Department of Biological Sciences, University of Lethbridge, Lethbridge, AB, Canada

## Supplementary Methods

### *Calculation of MOX kinetics and oxygen demand*

After each sampling, streamwater CH<sub>4</sub>, CO<sub>2</sub> and O<sub>2</sub> concentrations in the chambers were calculated as

$$C_a = \frac{C_b \cdot (V_c - V_s) + C_r \cdot V_s}{V_c} \quad (1),$$

where  $C_a$  is the expected concentration after sampling,  $C_b$  the measured concentration (before sampling),  $V_c$  the volume of the chamber,  $V_s$  the volume sampled (identical to the replaced volume), and  $C_r$  the concentration in the replaced water. Between each sampling time point, the concentrations of O<sub>2</sub>, CO<sub>2</sub> and CH<sub>4</sub> were calculated as

$$AC_i = (C_{a,i-1} + C_{b,i})/2 \quad (2),$$

where  $AC_i$  is the average concentration at time point  $i$ ,  $C_{a,i-1}$  the concentration after sampling (i.e., accounting for the dilution effect owing to sampling) of previous time point  $i-1$ , and  $C_{b,i}$  the concentration before the sampling (i.e., not accounting for the dilution effect of the sampling) of the time point  $i$ . Similarly, the consumption rates of O<sub>2</sub>, CO<sub>2</sub> and CH<sub>4</sub> were calculated between each time-point as

$$CR_i = (C_{a,i-1} - C_{b,i})/\Delta t \quad (3),$$

where  $CR_i$  is the consumption at time point,  $i$ , and  $\Delta t$  the time of  $i$  and  $i-1$ , respectively.

Rates of MOX were calculated using Michaelis-Menten kinetics as

$$v = V_{max} \cdot S / (K_s + S) \quad (4),$$

where  $v$  is the MOX velocity (or rate),  $V_{max}$  the maximum reaction velocity,  $S$  the CH<sub>4</sub> concentration, and  $K_s$  the concentration for which  $v = V_{max}/2$  (half-saturation constant).  $V_{max}$  and  $K_s$  were estimated for each site from all  $AC$  and  $CR$  values of triplicate experiments using the 'nls' function from nlstools package (Baty et al., 2015) of R v.3.3.1 (R Development Core Team, 2008). Values of  $V_{max}$  were normalized to surface area and expressed as nmol h<sup>-1</sup> m<sup>-2</sup> sediment.

Putative *in-situ* rates of MOX were then assessed for each stream using the Michaelis-Menten model (equation 4), knowing both kinetics parameters ( $V_{max}$  and  $K_s$ ) and the *in situ* CH<sub>4</sub> concentration ( $S$ ).

### *Re-analysis of published data of MOX rates in stream sediments*

Only few studies published kinetics data from MOX measured in stream sediments. Since  $V_{max}$  and  $K_S$  values were not estimated in these studies, we analysed the available raw data as described above. Data were collected directly from the published plots using the web interface WebPlotDigitizer (Rohatgi, 2015; <https://automeris.io/WebPlotDigitizer/>).

Only four studies observed Michealis-Menten kinetics of MOX in stream sediments, i.e. a decreasing MOX rate with decreasing  $CH_4$  concentrations (Trimmer et al., 2009, 2010; Shelley et al., 2015, 2015). Unfortunately, nls models with data from Trimmer et al. (2009) and Trimmer et al. (2010) did not converge. However, with data from Trimmer et al. (2015), we obtained a  $K_S$  value of 3.4  $\mu M$  and a  $V_{max}$  value of 2.73  $nmol\ g^{-1}\ h^{-1}$ . With data from Shelley et al. (2015), we found a  $K_S$  value of 3.9  $\mu M$  and a  $V_{max}$  value of 58.9  $nmol\ g^{-1}\ h^{-1}$ .

Kinetics parameters estimated here can also be compared to the  $CH_4$  oxidation rates measured by Shelley et al. (2014) in sediments from chalk streams. In this study, rates were assessed by linear decreases of  $CH_4$  in incubation chambers amended with 450 nM  $CH_4$ . Knowing the kinetics parameter of our 14 streams, we can calculate  $CH_4$  oxidation rates at this concentration, using equation 4. With such  $CH_4$  concentrations, benthic stream sediments would oxidize  $CH_4$  at rates comprised between 0 to 2.56  $nmol\ g^{-1}\ h^{-1}$ , with an average of 1.39  $nmol\ g^{-1}\ h^{-1}$ . This fits the rates observed by Shelley et al. (2014), ranging from 0.07 to 0.88  $nmol\ g^{-1}\ h^{-1}$ . Similarly, expected rates at a  $CH_4$  concentration of 100 nM (0 to 0.72  $nmol\ g^{-1}\ h^{-1}$ ) fit the ones measured by Shelley et al. (2017) in chalk streams at this concentration (0.16 to 1.75  $nmol\ g^{-1}\ h^{-1}$ ).

In the study from Rulík et al. (2013), MOX was expressed as  $mg\ CH_4\ kg^{-1}\ sediment\ dry\ weight\ day^{-1}$ , which can be compared to our measurements (all the other rates were expressed on a sediment volume basis). Since this rate was measured under high  $CH_4$  concentration (50 mL of 100%  $CH_4$  were added to 250-mL serum bottles containing 100 g of fresh sediment), it is very likely that at such concentrations, the rate of  $CH_4$  oxidation was saturated and so this rate corresponds to a  $V_{max}$  value. This rate of 11.9  $nmol\ g^{-1}\ h^{-1}$  is very close to the average  $V_{max}$  rate (12.9  $nmol\ g^{-1}\ h^{-1}$ ) measured here.

## Supplementary References

- Baty, F., Ritz, C., Charles, S., Brutsche, M., Flandrois, J.-P., and Delignette-Muller (2015). A Toolbox for nonlinear regression in R: The package nlstools. *J. Stat. Softw.* 66, 1–21.
- R Development Core Team (2008). *R: a language and environment for statistical computing*. Vienna, Austria: R Foundation for Statistical Computing Available at: <http://www.R-project.org>.
- Rohatgi, A. (2015). *WebPlotDigitalizer: HTML5 based online tool to extract numerical data from plot images*. Version 4.1 Available at: <https://automeris.io/WebPlotDigitizer>.
- Rulík, M., Mach, V., Brablcová, L., Buriánková, I., Badurová, P., and Gratzová, K. (2013). “Methanogenic system of a small lowland stream Sitka, Czech Republic,” in *Biomass Now-Cultivation Utilization* (IntechOpen), 395–426. Available at: [http://cdn.intechopen.com/pdfs/44416/InTech-Methanogenic\\_system\\_of\\_a\\_small\\_lowland\\_stream\\_sitka\\_czech\\_republic.pdf](http://cdn.intechopen.com/pdfs/44416/InTech-Methanogenic_system_of_a_small_lowland_stream_sitka_czech_republic.pdf) [Accessed January 12, 2016].
- Shelley, F., Abdullahi, F., Grey, J., and Trimmer, M. (2015). Microbial methane cycling in the bed of a chalk river: oxidation has the potential to match methanogenesis enhanced by warming. *Freshw. Biol.* 60, 150–160. doi:10.1111/fwb.12480.
- Shelley, F., Grey, J., and Trimmer, M. (2014). Widespread methanotrophic primary production in lowland chalk rivers. *Proc. R. Soc. Lond. B Biol. Sci.* 281, 20132854. doi:10.1098/rspb.2013.2854.
- Shelley, F., Ings, N., Hildrew, A. G., Trimmer, M., and Grey, J. (2017). Bringing methanotrophy in rivers out of the shadows. *Limnol. Oceanogr.* 62, 2345–2359. doi:10.1002/lno.10569.
- Trimmer, M., Hildrew, A. G., Jackson, M. C., Pretty, J. L., and Grey, J. (2009). Evidence for the role of methane-derived carbon in a free-flowing, lowland river food web. *Limnol. Oceanogr.* 54, 1541–1547. doi:10.4319/lo.2009.54.5.1541.
- Trimmer, M., Maanoja, S., Hildrew, A. G., Pretty, J. L., and Grey, J. (2010). Potential carbon fixation via methane oxidation in well-oxygenated river bed gravels. *Limnol. Oceanogr.* 55, 560–568. doi:10.4319/lo.2010.55.2.0560.

**Supplementary Table S1.** Percent land cover for the catchments of the 14 sites estimated from the 2018 Corine land cover database.

|       | Non-irrigated arable land | Mixed forest | Coniferous forest | Natural grasslands | Bare rocks | Discontinuous urban fabric | Land principally occupied by agriculture | Sparsely vegetated areas | Transitional woodland-shrub | Broad-leaved forest | Pastures | Moors and heathland | Industrial or commercial units | Glaciers and perpetual snow |
|-------|---------------------------|--------------|-------------------|--------------------|------------|----------------------------|------------------------------------------|--------------------------|-----------------------------|---------------------|----------|---------------------|--------------------------------|-----------------------------|
| Adn-1 | 0.0                       | 4.4          | 6.3               | 19.3               | 52.3       | 0.0                        | 0.0                                      | 12.1                     | 1.6                         | 0.0                 | 0.0      | 2.6                 | 0.0                            | 1.3                         |
| Com-1 | 96.9                      | 3.0          | 0.0               | 0.0                | 0.0        | 0.1                        | 0.0                                      | 0.0                      | 0.0                         | 0.0                 | 0.0      | 0.0                 | 0.0                            | 0.0                         |
| Com-1 | 96.9                      | 3.0          | 0.0               | 0.0                | 0.0        | 0.1                        | 0.0                                      | 0.0                      | 0.0                         | 0.0                 | 0.0      | 0.0                 | 0.0                            | 0.0                         |
| Geb-1 | 96.8                      | 3.2          | 0.0               | 0.0                | 0.0        | 0.1                        | 0.0                                      | 0.0                      | 0.0                         | 0.0                 | 0.0      | 0.0                 | 0.0                            | 0.0                         |
| Sen-1 | 96.5                      | 3.1          | 0.0               | 0.0                | 0.0        | 0.4                        | 0.0                                      | 0.0                      | 0.0                         | 0.0                 | 0.0      | 0.0                 | 0.0                            | 0.0                         |
| Sor-1 | 92.8                      | 1.0          | 0.0               | 0.0                | 0.0        | 5.1                        | 0.0                                      | 0.0                      | 0.0                         | 0.0                 | 0.0      | 0.0                 | 0.9                            | 0.0                         |
| Sor-2 | 92.8                      | 1.0          | 0.0               | 0.0                | 0.0        | 5.1                        | 0.0                                      | 0.0                      | 0.0                         | 0.0                 | 0.0      | 0.0                 | 0.9                            | 0.0                         |
| Sor-3 | 92.8                      | 1.0          | 0.0               | 0.0                | 0.0        | 5.1                        | 0.0                                      | 0.0                      | 0.0                         | 0.0                 | 0.0      | 0.0                 | 0.9                            | 0.0                         |
| Tal-1 | 86.9                      | 6.7          | 0.0               | 0.0                | 0.0        | 6.0                        | 0.0                                      | 0.0                      | 0.0                         | 0.0                 | 0.4      | 0.0                 | 0.0                            | 0.0                         |
| Ven-1 | 51.9                      | 20.2         | 13.1              | 1.5                | 0.0        | 5.3                        | 1.2                                      | 0.0                      | 1.1                         | 3.2                 | 1.5      | 0.0                 | 0.6                            | 0.0                         |
| Ven-2 | 53.5                      | 20.9         | 13.6              | 1.6                | 0.0        | 2.7                        | 1.2                                      | 0.0                      | 1.2                         | 3.3                 | 1.6      | 0.0                 | 0.3                            | 0.0                         |
| Vev-1 | 0.0                       | 6.3          | 25.9              | 52.4               | 0.0        | 1.5                        | 12.6                                     | 0.0                      | 1.2                         | 0.0                 | 0.0      | 0.0                 | 0.0                            | 0.0                         |
| Vey-1 | 63.7                      | 15.4         | 15.8              | 1.9                | 0.0        | 0.4                        | 0.8                                      | 0.0                      | 1.4                         | 0.3                 | 0.0      | 0.0                 | 0.0                            | 0.0                         |
| Vey-2 | 65.2                      | 15.3         | 16.2              | 1.7                | 0.0        | 0.1                        | 0.0                                      | 0.0                      | 1.4                         | 0.0                 | 0.0      | 0.0                 | 0.0                            | 0.0                         |

**Supplementary Table S2.** Names, localizations and sampling dates of the 14 streams sampled during this survey, together with selected chemical parameters of stream waters.

| Stream name       | Tag name | GPS (WGS84, °)          | Altitude (m) | Sampling date | CH <sub>4</sub> (μM) | O <sub>2</sub> (μM) | CO <sub>2</sub> (μM) | DOC (μM) | Cl <sup>-</sup> (mM) | SO <sub>4</sub> <sup>2-</sup> (mM) | NO <sub>3</sub> <sup>-</sup> (mM) | Ca <sup>2+</sup> (mM) | pH   | Temp. (°C) |
|-------------------|----------|-------------------------|--------------|---------------|----------------------|---------------------|----------------------|----------|----------------------|------------------------------------|-----------------------------------|-----------------------|------|------------|
| La Veveyse        | Vev-1    | N 46.527289, E 6.922661 | 868          | 11.04.2016    | 0.005                | 367.19              | 34.83                | 133.68   | 0.044                | 0.067                              | 0.007                             | 1.032                 | 8.39 | 5.1        |
| L'Avançon de Nant | Adn-1    | N 46.253852, E 7.109585 | 1189         | 28.03.2016    | 0.004                | 363.33              | 27.14                | 14.19    | 0.004                | 0.166                              | 0.009                             | 0.724                 | 7.81 | 2.7        |
| Le Talent         | Tal-1    | N 46.590450, E 6.666399 | 723          | 04.04.2016    | 0.006                | 361.09              | 31.76                | 156.20   | 0.195                | 0.117                              | 0.050                             | 1.020                 | 8.22 | 7.4        |
| Le Combagno       | Com-1    | N 46.574373, E 6.441875 | 594          | 02.05.2016    | 0.011                | 346.77              | 72.09                | 320.11   | 0.180                | 0.125                              | 0.125                             | 1.928                 | 8.38 | 9.3        |
| Le Veyron         | Vey-1    | N 46.640305, E 6.483072 | 523          | 17.05.2016    | 0.018                | 338.54              | 62.92                | 202.48   | 0.189                | 0.086                              | 0.126                             | 1.134                 | 7.76 | 9.5        |
| Le Veyron         | Vey-2    | N 46.584923, E 6.400136 | 663          | 28.06.2016    | 0.572                | 248.75              | 197.95               | 222.31   | 0.182                | 0.087                              | 0.147                             | 1.953                 | 7.93 | 11.5       |
| La Sorge          | Sor-1    | N 46.522506, E 6.571378 | 386          | 14.03.2016    | 0.134                | 369.69              | 37.74                | 124.24   | 0.434                | 0.446                              | 0.150                             | 1.379                 | 8.20 | 5.9        |
| Le Combagno       | Com-2    | N 46.574073, E 6.441998 | 594          | 02.05.2016    | 0.053                | 339.58              | 71.82                | 328.37   | 0.317                | 0.121                              | 0.182                             | 2.081                 | 8.37 | 5.9        |
| La Venoge         | Ven-1    | N 46.525409, E 6.545010 | 378          | 21.03.2016    | 0.120                | 338.13              | 82.56                | 149.04   | 0.506                | 0.231                              | 0.248                             | 1.361                 | 7.96 | 7.4        |
| La Sorge          | Sor-3    | N 46.522506, E 6.571378 | 386          | 20.06.2016    | 0.124                | 306.56              | 60.81                | 242.70   | 0.479                | 0.359                              | 0.254                             | 1.682                 | 8.30 | 12.8       |
| La Venoge         | Ven-2    | N 46.551325, E 6.540395 | 391          | 04.07.2016    | 0.234                | 299.38              | 85.34                | 144.90   | 0.429                | 0.318                              | 0.256                             | 2.507                 | 8.19 | 15.7       |
| La Gèbre          | Geb-1    | N 46.624060, E 6.462538 | 575          | 11.07.2016    | 0.125                | 225.63              | 306.62               | 204.41   | 0.316                | 0.229                              | 0.260                             | 2.631                 | 7.97 | 15.6       |
| La Sorge          | Sor-2    | N 46.522506, E 6.571378 | 386          | 14.06.2016    | 0.133                | 290.63              | 51.69                | 247.11   | 0.477                | 0.353                              | 0.263                             | 1.753                 | 8.40 | 13.9       |
| La Senoge         | Sen-1    | N 46.556722, E 6.482098 | 489          | 25.04.2016    | 0.336                | 315.63              | 142.43               | 206.06   | 0.613                | 0.229                              | 0.372                             | 1.959                 | 8.16 | 8.6        |

**Supplementary Table S3.** Methanotrophic community contribution,  $V_{max}$  and  $K_S$  values of MOX incubations, CH<sub>4</sub> concentrations in stream- and shallow porewaters, computed *in situ* rates of MOX and rates of methanotrophic carbon fixation for all fourteen streams.

| Stream | Sediment surface area (m <sup>2</sup> g <sup>-1</sup> ) | Microbial cells density (cells m <sup>-2</sup> ) | Methanotrophs                     |                                                       | CH <sub>4</sub> oxidation kinetics                           |                                                                |                                            | CH <sub>4</sub> concentrations in streams |                                                                  |                                                                                                         | In-situ rates                                                                          |                                                        |                                           |       |       |
|--------|---------------------------------------------------------|--------------------------------------------------|-----------------------------------|-------------------------------------------------------|--------------------------------------------------------------|----------------------------------------------------------------|--------------------------------------------|-------------------------------------------|------------------------------------------------------------------|---------------------------------------------------------------------------------------------------------|----------------------------------------------------------------------------------------|--------------------------------------------------------|-------------------------------------------|-------|-------|
|        |                                                         |                                                  | abundance of Methylococcaceae (%) | pmoA-harboring cells density (cells m <sup>-2</sup> ) | Vmax (nmol CH <sub>4</sub> g <sup>-1</sup> h <sup>-1</sup> ) | Ks (nmol CH <sub>4</sub> m <sup>-2</sup> h <sup>-1</sup> (μM)) | CH <sub>4</sub> conc. in stream-water (μM) | CH <sub>4</sub> conc. in porewater (μM)   | CH <sub>4</sub> conc. 2.5 cm below streambed (interpolated) (μM) | Putative in-situ CH <sub>4</sub> oxidation rate (nmol CH <sub>4</sub> g <sup>-1</sup> h <sup>-1</sup> ) | CH <sub>4</sub> oxidation rate (nmol CH <sub>4</sub> m <sup>-2</sup> h <sup>-1</sup> ) | Putative in-situ carbon fixation rate by methanotrophs |                                           |       |       |
|        |                                                         |                                                  |                                   |                                                       |                                                              |                                                                |                                            |                                           |                                                                  |                                                                                                         |                                                                                        | (nmol C g <sup>-1</sup> h <sup>-1</sup> )              | (nmol C m <sup>-2</sup> h <sup>-1</sup> ) |       |       |
| Adn-1  | 1.362                                                   | 1.91 x 10 <sup>7</sup>                           | 0.001                             | < d.l.                                                | 0.00%                                                        | 0                                                              | 0                                          | 0                                         | 0.004                                                            | 0.011 (at 8 cm)                                                                                         | 0.006                                                                                  | 0                                                      | 0                                         | 0     | 0     |
| Com-1  | 0.856                                                   | 3.62 x 10 <sup>8</sup>                           | 0.061                             | 5.5 x 10 <sup>5</sup>                                 | 0.15%                                                        | 5.25                                                           | 6.13                                       | 0.98                                      | 0.011                                                            | 1.493 (at 9.7 cm)                                                                                       | 0.394                                                                                  | 2.62                                                   | 3.07                                      | 1.31  | 1.53  |
| Com-2  | 0.999                                                   | 3.24 x 10 <sup>8</sup>                           | 0.255                             | 5.92 x 10 <sup>6</sup>                                | 0.18%                                                        | 9.68                                                           | 9.69                                       | 2.68                                      | 0.053                                                            | 0.503 (at 9 cm)                                                                                         | 0.178                                                                                  | 4.84                                                   | 4.85                                      | 2.42  | 2.42  |
| Geb-1  | 0.981                                                   | 1.69 x 10 <sup>8</sup>                           | 0.118                             | 9.66 x 10 <sup>6</sup>                                | 0.57%                                                        | 9.54                                                           | 9.72                                       | 1.23                                      | 0.125                                                            | 65.75 (at 5 cm)                                                                                         | 32.935                                                                                 | 4.77                                                   | 4.86                                      | 2.38  | 2.43  |
| Sen-1  | 1.263                                                   | 8.22 x 10 <sup>7</sup>                           | 1.334                             | 2.18 x 10 <sup>6</sup>                                | 2.65%                                                        | 38.06                                                          | 30.13                                      | 8.11                                      | 0.327                                                            | 201.9 (at 10 cm)                                                                                        | 50.735                                                                                 | 19.03                                                  | 15.06                                     | 9.52  | 7.53  |
| Sor-1  | 0.992                                                   | 5.62 x 10 <sup>7</sup>                           | 0.460                             | 5.94 x 10 <sup>5</sup>                                | 1.06%                                                        | 8.61                                                           | 8.68                                       | 2.38                                      | 0.134                                                            | 6.859 (at 10 cm)                                                                                        | 1.815                                                                                  | 4.31                                                   | 4.34                                      | 2.15  | 2.17  |
| Sor-2  | 0.863                                                   | 7.86 x 10 <sup>7</sup>                           | 0.499                             | 8.3 x 10 <sup>5</sup>                                 | 1.06%                                                        | 13.26                                                          | 15.36                                      | 3.47                                      | 0.133                                                            | 101.8 (at 9.3 cm)                                                                                       | 27.354                                                                                 | 6.63                                                   | 7.68                                      | 3.31  | 3.84  |
| Sor-3  | 0.886                                                   | 1.85 x 10 <sup>8</sup>                           | 0.393                             | 7.33 x 10 <sup>5</sup>                                | 0.40%                                                        | 10.69                                                          | 12.07                                      | 2.30                                      | 0.124                                                            | 5.159 (at 10 cm)                                                                                        | 1.383                                                                                  | 5.34                                                   | 6.03                                      | 2.67  | 3.02  |
| Tal-1  | 1.154                                                   | 5.35 x 10 <sup>7</sup>                           | 0.063                             | 1.39 x 10 <sup>5</sup>                                | 0.26%                                                        | 2.55                                                           | 2.21                                       | 0.28                                      | 0.006                                                            | 0.847 (at 10 cm)                                                                                        | 0.216                                                                                  | 1.27                                                   | 1.10                                      | 0.64  | 0.55  |
| Ven-1  | 1.365                                                   | 5.22 x 10 <sup>7</sup>                           | 0.952                             | 4.95 x 10 <sup>5</sup>                                | 0.95%                                                        | 14.31                                                          | 10.48                                      | 4.37                                      | 0.120                                                            | 0.008 (at 10 cm)                                                                                        | 0.092                                                                                  | 7.16                                                   | 5.24                                      | 3.58  | 2.62  |
| Ven-2  | 0.982                                                   | 9.79 x 10 <sup>7</sup>                           | 0.586                             | 5.65 x 10 <sup>5</sup>                                | 0.58%                                                        | 5.03                                                           | 5.12                                       | 1.40                                      | 0.234                                                            | 47.70 (at 10 cm)                                                                                        | 12.101                                                                                 | 2.51                                                   | 2.56                                      | 1.26  | 1.28  |
| Vev-1  | 5.501                                                   | 4.6 x 10 <sup>6</sup>                            | 0.076                             | 8.41 x 10 <sup>3</sup>                                | 0.18%                                                        | 0                                                              | 0                                          | 0                                         | 0.005                                                            | 0.024 (at 6 cm)                                                                                         | 0.013                                                                                  | 0                                                      | 0                                         | 0     | 0     |
| Vey-1  | 1.012                                                   | 1.90 x 10 <sup>8</sup>                           | 0.986                             | 8 x 10 <sup>5</sup>                                   | 0.42%                                                        | 10.91                                                          | 10.78                                      | 4.92                                      | 0.018                                                            | 4.821 (at 8.7 cm)                                                                                       | 1.403                                                                                  | 5.46                                                   | 5.39                                      | 2.73  | 2.69  |
| Vey-2  | 0.986                                                   | 2.81 x 10 <sup>8</sup>                           | 1.996                             | 3.77 x 10 <sup>6</sup>                                | 1.34%                                                        | 53.09                                                          | 53.86                                      | 10.59                                     | 0.572                                                            | 9.072 (at 6 cm)                                                                                         | 4.114                                                                                  | 26.55                                                  | 26.93                                     | 13.27 | 13.47 |

**Supplementary Table S4.** OTU table of the 16S rRNA sequencing analysis, including the taxonomic annotation and the sequence of each OTU (online).

## Supplementary Figures

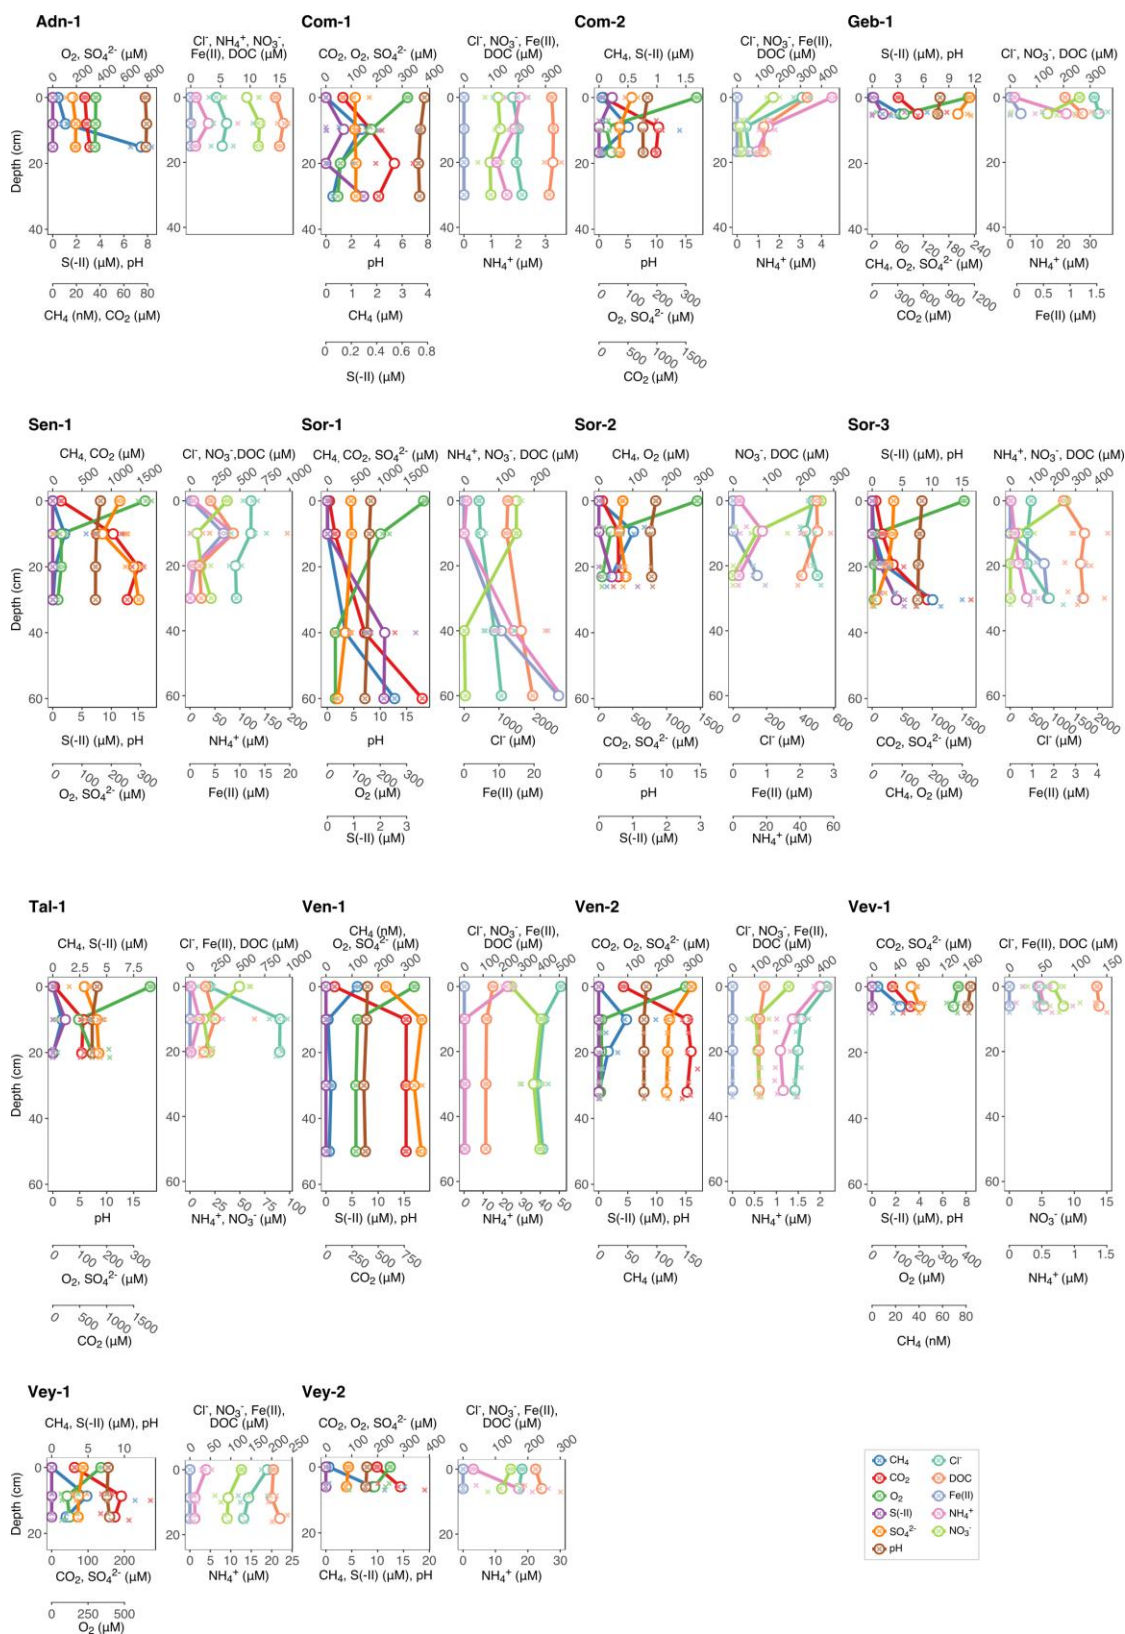

**Supplementary Figure S1.** Stream porewater profiles. Open symbols represent replicates, plain symbols represent averaged values.

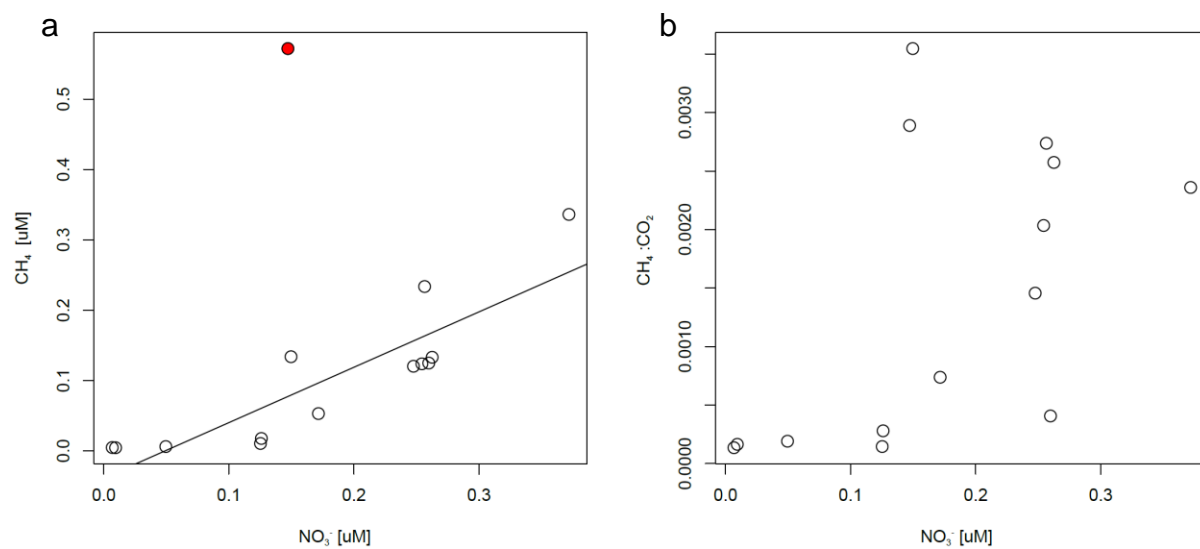

**Supplementary Figure S2.** Streamwater  $\text{CH}_4$  concentration was significantly positively related to  $\text{NO}_3^-$  concentration (a) when site Vey-2 (in red) is excluded (see main text). Also, the ratio of streamwater  $\text{CH}_4$  to  $\text{CO}_2$  increased in streams with elevated  $\text{NO}_3^-$  concentrations (b).

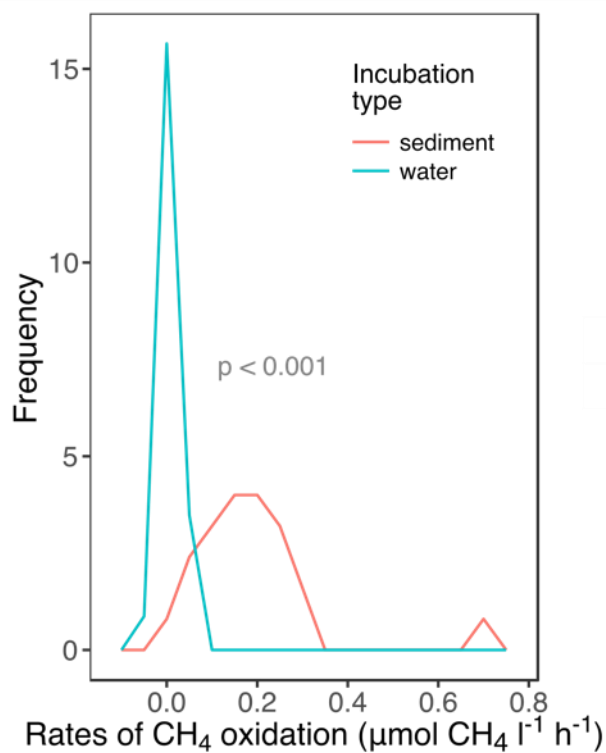

**Supplementary Figure S3.** Frequency distribution of MOX rates measured in laboratory incubations during the first 24 h. The blue curve represents the incubations with streamwater only, while the red curve represents incubations with sediments (in streamwater). Incubations with sediments had significantly higher MOX rates than incubations without (ANOVA,  $p < 0.001$ ), suggesting that methanotrophic activity mainly takes place in streambed sediments.

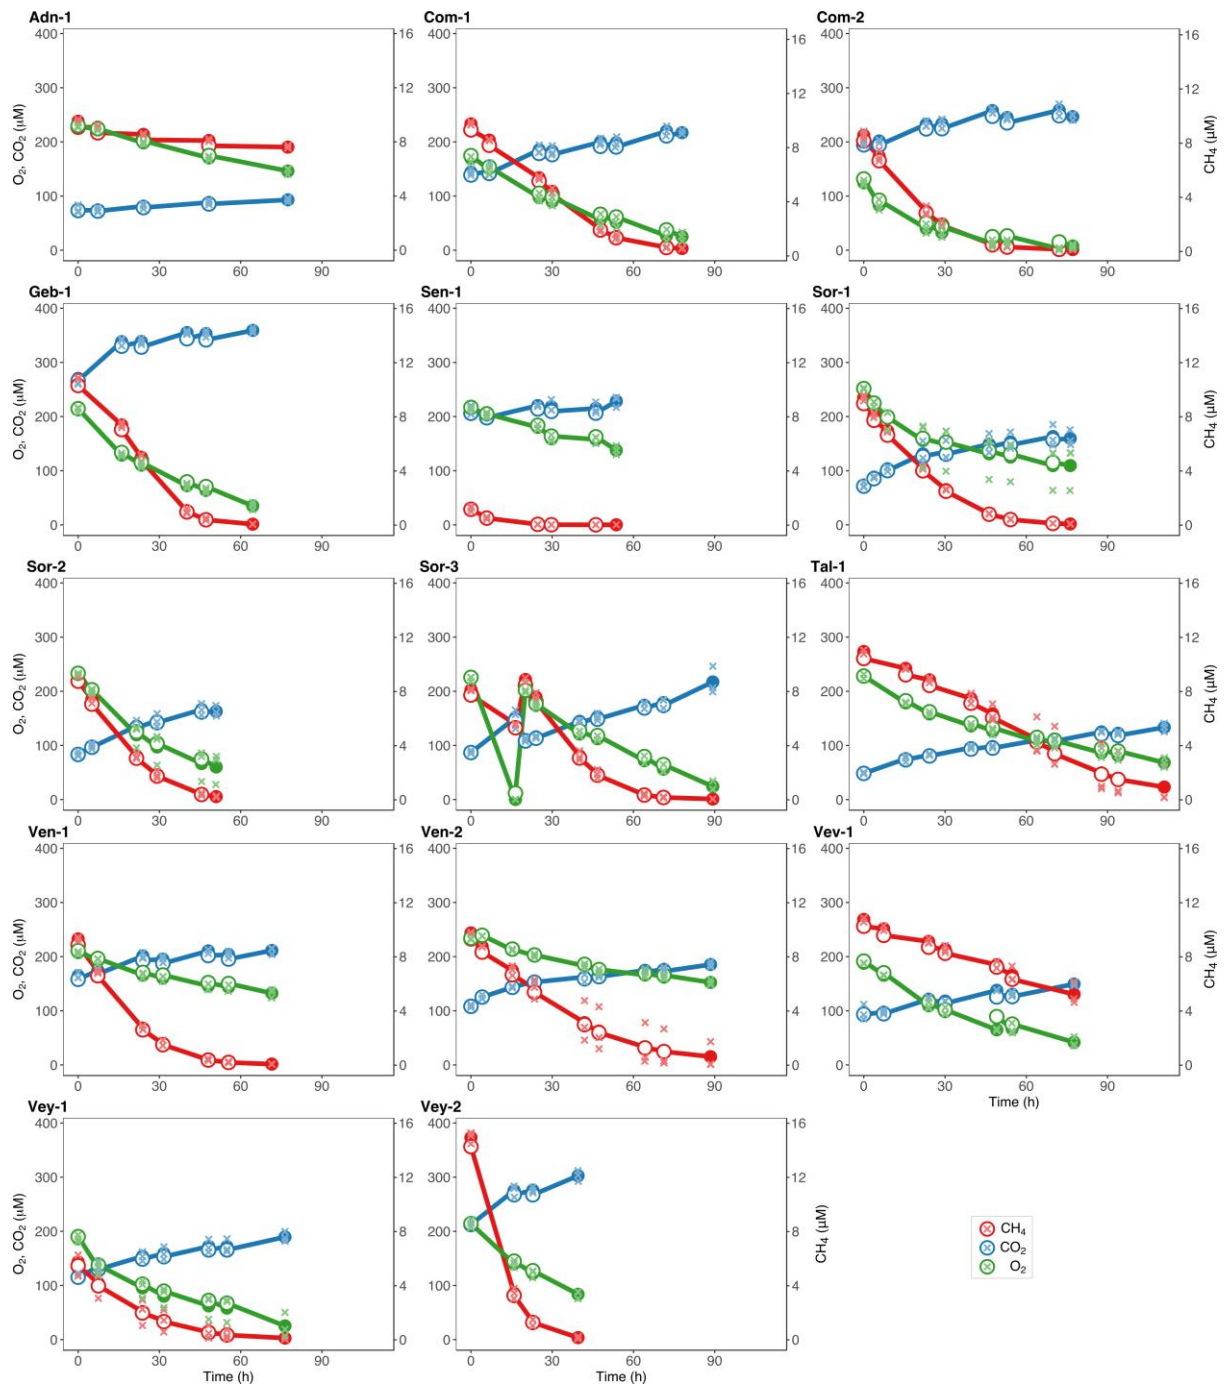

**Supplementary Figure S4.** Change over time of CH<sub>4</sub> (red symbols), CO<sub>2</sub> (blue symbols) and O<sub>2</sub> (green symbols) in laboratory incubations of ~25 g of sediment in stream water amended with CH<sub>4</sub>. Crosses represent replicates, filled circles represent averages, and open circles represent average concentration accounting for the dilution due to sampling. The steps occur due to the replacement of water during sampling and is accounted for in the rate measurements.

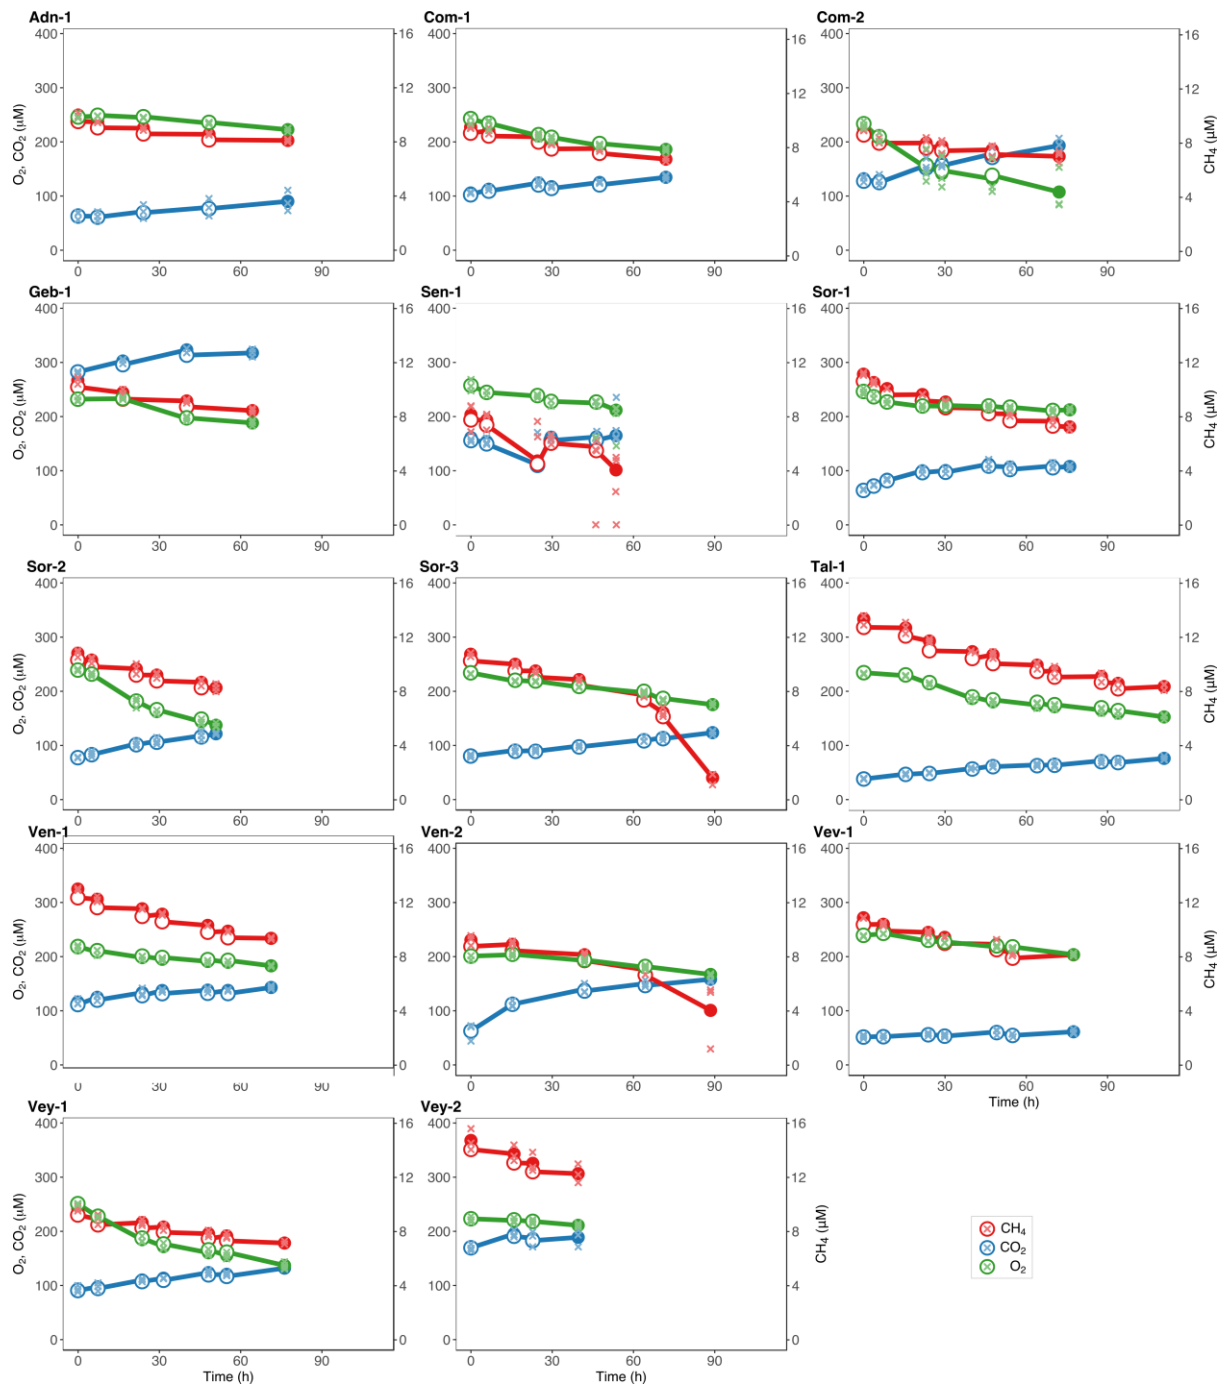

**Supplementary Figure S5.** Change over time of CH<sub>4</sub> (red symbols), CO<sub>2</sub> (blue symbols) and O<sub>2</sub> (green symbols) in laboratory incubations of stream water only amended with CH<sub>4</sub>. Crosses represent replicates, filled circles represent averages, and open circles represent average concentration accounting for the dilution due to sampling. The steps occur due to the replacement of water during sampling and is accounted for in the rate measurements.

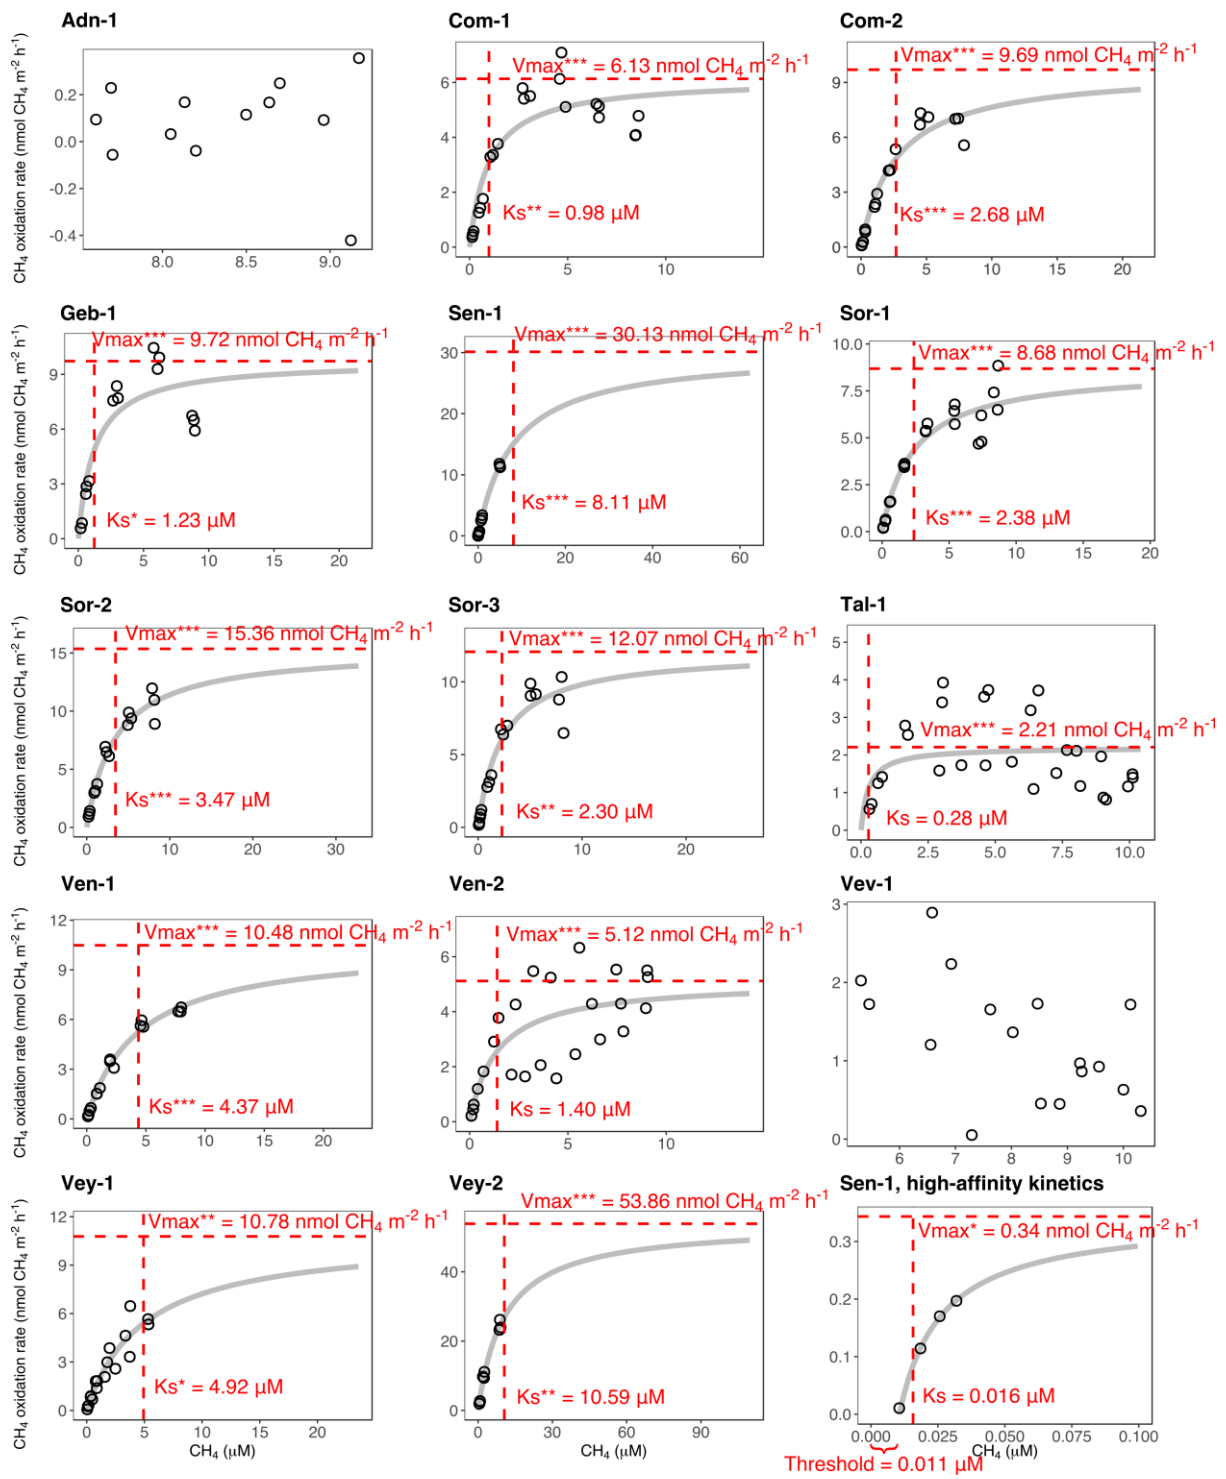

**Supplementary Figure S6.** Michaelis-Menten models of MOX rates measured in laboratory incubations. Dots represent measurements, grey lines show the kinetic models, vertical and horizontal red dashed lines represent  $V_{max}$  and  $K_S$  values, respectively. For streams Adn-1 and Vev-1, the kinetics could not be modelled, due to the absence of activity. The p-value of the model's parameters,  $V_{max}$  and  $K_S$ , is indicated by stars (\*\*\*)  $< 0.001 < ** < 0.01 < * < 0.05$ ).

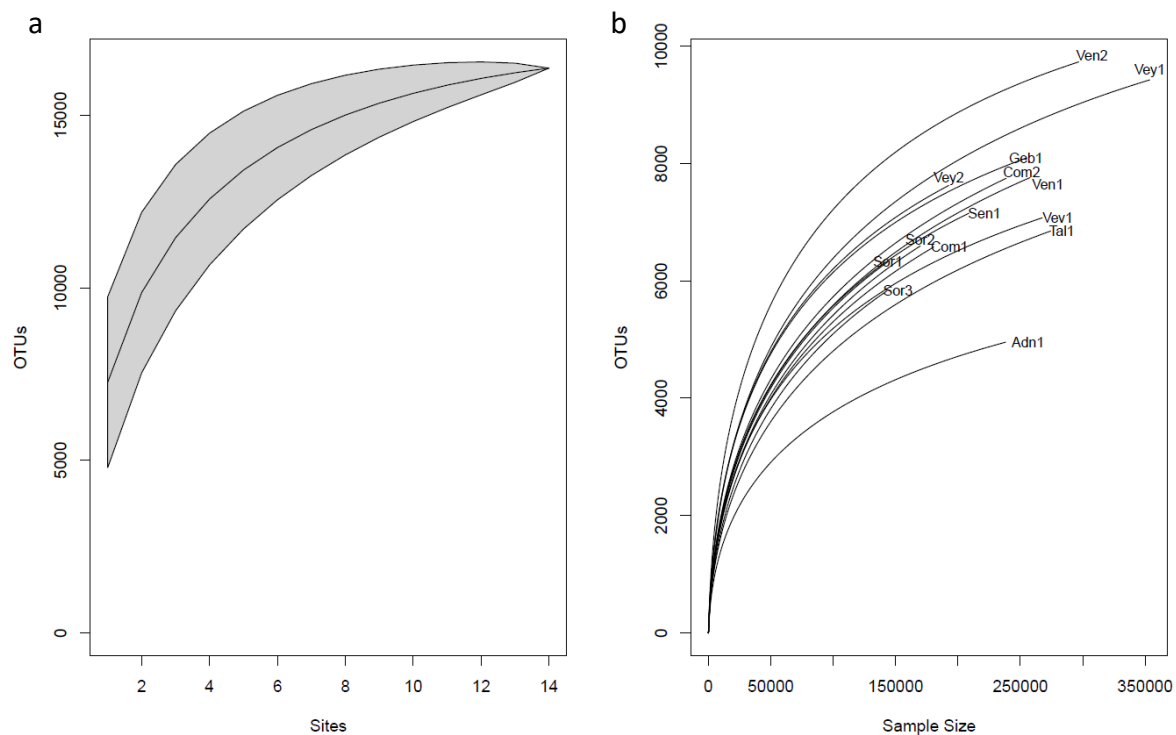

**Supplementary Figure S7.** Accumulation curve (a) and sample rarefaction curves (b) showing the number of OTUs detected at each site.
